# Supplementary material for: Usefulness of Arterial Subtraction in Applying Liver Imaging Reporting and Data System (LI-RADS) Treatment Response Algorithm to Gadoxetic Acid-Enhanced MRI
Source: PubMed Central journal article supplement — Korean J Radiol. 2021 May 20;22(8):1289–99. doi: 10.3348/kjr.2020.1394 (PMC8316782; doi:10.3348/kjr.2020.1394), 2021-05-20
Supplement: kjr-22-1289-s001.pdf [file kjr-22-1289-s001.pdf]

## SUPPLEMENT

### Supplementary Material

#### **Image Quality of Arterial Subtraction Images**

The image quality of the arterial subtraction images obtained by post-treatment MRI was assessed using the following 5-point scale: 1, overall non-diagnostic image quality; 2, severe subtraction artifacts (maximum thickness of subtraction bands > 5 mm, or more than two-thirds of either liver margins or vascular markings are ill-defined); 3, moderate subtraction artifacts (maximum thickness of subtraction bands of 2–5 mm, or between one-third and two-thirds of either liver margins or vascular markings are ill-defined); 4, good overall image quality with minimal artifacts (maximum thickness of subtraction bands < 2 mm, or less than one-third of either the liver margins or vascular markings are ill-defined); and 5, perfect overall image quality without any artifacts.
