# Supplementary material for: Usefulness of Arterial Subtraction in Applying Liver Imaging Reporting and Data System (LI-RADS) Treatment Response Algorithm to Gadoxetic Acid-Enhanced MRI
Source: PubMed Central journal article supplement — Korean J Radiol. 2021 May 20;22(8):1289–99. doi: 10.3348/kjr.2020.1394 (PMC8316782; doi:10.3348/kjr.2020.1394), 2021-05-20
Supplement: kjr-22-1289-s002.pdf [file kjr-22-1289-s002.pdf]

**Supplementary Table 1. MRI Sequence Parameters**

|                            | Sequence  |           |                  |                  |           |           |           |           |
|----------------------------|-----------|-----------|------------------|------------------|-----------|-----------|-----------|-----------|
|                            | 3D T1 GRE |           | Dual-Echo T1 GRE |                  | FSE T2    |           | DWI*      |           |
|                            | 1.5T      | 3T        | 1.5T             | 3T               | 1.5T      | 3T        | 1.5T      | 3T        |
| Repetition time, ms        | 4.4       | 3.5       | 125              | 130              | 1983      | 4400      | 1558      | 6200      |
| Echo time, ms              | 2.1       | 1.2–1.4   | 2.3, OP; 4.6, IP | 1.3, OP; 2.6, IP | 80        | 100       | 59        | 70        |
| Flip angle, °              | 10        | 9         | 80               | 52               | 90        | 150       | 90        | 90        |
| Matrix                     | 216 × 221 | 360 × 210 | 316 × 256        | 360 × 270        | 284 × 229 | 448 × 202 | 128 × 126 | 303 × 379 |
| Field of view, mm          | 370 × 370 | 350 × 300 | 370 × 370        | 350 × 300        | 370 × 370 | 350 × 300 | 370 × 370 | 240 × 300 |
| Echo train length          | NA        | NA        | NA               | NA               | 15        | 21        | 51        | 44        |
| Section thickness, mm      | 4         | 3         | 6                | 3–6              | 6         | 6         | 6         | 6         |
| No. of signal acquisitions | 1         | 1         | 1                | 1                | 1         | 2         | 2         | 5         |

Parallel imaging was performed using a k-space-based technique (SENSE at 1.5T, Philips; CAIPIRINHA at 3T, Siemens Healthcare).

\*DWI was performed using four b-values of 0, 50, 500, and 800 s/mm<sup>2</sup>. DWI = diffusion-weighted imaging, FSE = fast-spin echo, GRE = gradient-recalled echo, IP = in-phase, NA = not applicable, OP = out-of-phase, T1 = T1-weighted, T2 = T2-weighted, 3D = three-dimensional
