# Supplementary material for: Usefulness of Arterial Subtraction in Applying Liver Imaging Reporting and Data System (LI-RADS) Treatment Response Algorithm to Gadoxetic Acid-Enhanced MRI
Source: PubMed Central journal article supplement — Korean J Radiol. 2021 May 20;22(8):1289–99. doi: 10.3348/kjr.2020.1394 (PMC8316782; doi:10.3348/kjr.2020.1394), 2021-05-20
Supplement: kjr-22-1289-s003.pdf [file kjr-22-1289-s003.pdf]

**Supplementary Table 2. Subgroup Analysis of Diagnostic Performance for LI-RADS Treatment Response in the Lesions with Precontrast T1 Hyperintensity and with Iso- or Hypointensity for Predicting Viable HCC**

|                                                   | Sensitivity, %           | <i>P</i>           | Specificity, %             | <i>P</i>             | Accuracy, %              |
|---------------------------------------------------|--------------------------|--------------------|----------------------------|----------------------|--------------------------|
| Lesions with precontrast T1 hyperintensity        |                          |                    |                            |                      |                          |
| LR-TR viable                                      |                          | 0.063*             |                            | > 0.999 <sup>†</sup> |                          |
| Ordinary arterial-phase images                    | 34.8 (16.4–57.3) [8/23]  |                    | 100.0 (80.5–100.0) [17/17] |                      | 62.5 (45.8–60.4) [25/40] |
| Arterial subtraction images                       | 56.5 (34.5–76.8) [13/23] |                    | 94.1 (71.3–99.9) [16/17]   |                      | 72.5 (56.1–85.4) [29/40] |
| LR-TR viable + equivocal                          |                          | 0.008 <sup>‡</sup> |                            | 0.500 <sup>§</sup>   |                          |
| Ordinary arterial-phase images                    | 34.8 (16.4–57.3) [8/23]  |                    | 100.0 (80.5–100.0) [17/17] |                      | 62.5 (45.8–60.4) [25/40] |
| Arterial subtraction images                       | 69.6 (47.1–86.8) [16/23] |                    | 88.2 (63.6–98.5) [15/17]   |                      | 77.5 (61.6–89.2) [31/40] |
| Lesions with precontrast T1 iso- or hypointensity |                          |                    |                            |                      |                          |
| LR-TR viable                                      |                          | 0.063*             |                            | > 0.999 <sup>†</sup> |                          |
| Ordinary arterial-phase images                    | 76.0 (61.8–86.9) [38/50] |                    | 86.7 (59.5–98.3) [13/15]   |                      | 78.5 (66.5–87.7) [51/65] |
| Arterial subtraction images                       | 86.0 (73.3–94.2) [43/50] |                    | 86.7 (59.5–98.3) [13/15]   |                      | 86.2 (75.3–93.5) [56/65] |
| LR-TR viable + equivocal                          |                          | 0.625 <sup>‡</sup> |                            | 0.500 <sup>§</sup>   |                          |
| Ordinary arterial-phase images                    | 86.0 (73.3–94.2) [43/50] |                    | 73.3 (44.9–92.2) [11/15]   |                      | 83.1 (71.7–91.2) [54/65] |
| Arterial subtraction images                       | 90.0 (78.2–96.7) [45/50] |                    | 60.0 (32.3–86.7) [9/15]    |                      | 83.1 (71.7–91.2) [54/65] |

Data in parentheses are 95% confidence intervals, and data in brackets are number of lesions. \*Comparison of sensitivity between ordinary arterial-phase image and arterial subtraction image when LR-TR viable was regarded as viable HCC, <sup>†</sup>Comparison of specificity between ordinary arterial-phase image and arterial subtraction image when LR-TR viable was regarded as viable HCC, <sup>‡</sup>Comparison of sensitivity between ordinary arterial-phase image and arterial subtraction image when both LR-TR viable and equivocal were regarded as viable HCC, <sup>§</sup>Comparison of specificity between ordinary arterial-phase image and arterial subtraction image when both LR-TR viable and equivocal were regarded as viable HCC. HCC = hepatocellular carcinoma, LI-RADS = Liver Imaging Reporting and Data System, LR-TR = LI-RADS treatment response
