# Supplementary material for: Usefulness of Arterial Subtraction in Applying Liver Imaging Reporting and Data System (LI-RADS) Treatment Response Algorithm to Gadoxetic Acid-Enhanced MRI
Source: PubMed Central journal article supplement — Korean J Radiol. 2021 May 20;22(8):1289–99. doi: 10.3348/kjr.2020.1394 (PMC8316782; doi:10.3348/kjr.2020.1394), 2021-05-20
Supplement: kjr-22-1289-s004.pdf [file kjr-22-1289-s004.pdf]

**Supplementary Table 3. Interobserver Agreement for LI-RADS Treatment Response Features on Gadoteric Acid-Enhanced MRI**

|                                                        | Proportion of Agreement | Kappa Value |
|--------------------------------------------------------|-------------------------|-------------|
| No lesional enhancement                                | 83/105 (79.0)           | 0.473       |
| Treatment-specific expected enhancement                | 88/105 (83.9)           | 0.469       |
| NMLIT with APHE on ordinary arterial-phase images      | 93/105 (88.6)           | 0.750       |
| NMLIT with APHE on arterial subtraction images         | 94/105 (89.5)           | 0.790       |
| NMLIT with washout appearance                          | 84/105 (80.0)           | 0.524       |
| NMLIT with enhancement similar to pretreatment imaging | 95/105 (90.5)           | 0.722       |
| Final LR-TR category on ordinary arterial-phase images | 81/105 (77.1)           | 0.597       |
| Final LR-TR category on arterial subtraction images    | 85/105 (81.0)           | 0.661       |
| Size of viable or equivocally viable lesion, mm        | NA                      | 0.842*      |

Unless otherwise indicated, data are number (%) of lesions. \*Agreement was evaluated using the intraclass correlation coefficient. APHE = arterial phase hyperenhancement, LI-RADS = Liver Imaging Reporting and Data System, LR-TR = LI-RADS treatment response, NA = not applicable, NMLIT = nodular, mass-like, or irregular thick tissue in or along the treated lesion
